# Supplementary material for: Blockade of Nuclear β‐Catenin Signaling via Direct Targeting of RanBP3 with NU2058 Induces Cell Senescence to Suppress Colorectal Tumorigenesis
Source: PubMed Central journal article supplement (PMC9731691; doi:10.1002/advs.202202528), 2022-10-21
Supplement: ADVS-9-2202528-s001.pdf [file ADVS-9-2202528-s001.pdf]

## Supporting Information

for *Adv. Sci.*, DOI 10.1002/adv.202202528

Blockade of Nuclear  $\beta$ -Catenin Signaling via Direct Targeting of RanBP3 with NU2058  
Induces Cell Senescence to Suppress Colorectal Tumorigenesis

*Can-Can Zheng, Long Liao, Ya-Ping Liu, Yan-Ming Yang, Yan He, Guo-Geng Zhang, Shu-Jun Li,  
Ting Liu, Wen Wen Xu\* and Bin Li\**

### **Supplementary Figure legends**

**Supplementary Figure 1.** (A) The body weight of nude mice exposed to NU2058 was monitored. (B) Representative images of the lung, liver, kidney tissues stained by H&E staining. (C) Serum alanine transaminase activity (ALT), serum aspartate transaminase activity (AST), hemoglobin (HGB), red blood cells (RBC), platelets (PLTs), lymphocyte levels were detected in NU2058-treated and control groups (n = 3). (D) The cell proliferation of KYSE410 and Huh7 cells was suppressed by NU2058. Bars, SD; \*,  $P < 0.05$ ; \*\*,  $P < 0.01$ ; \*\*\*,  $P < 0.001$ .

**Supplementary Figure 2.** Comparison of the anticancer effects of NU2058 with other  $\beta$ -Catenin inhibitors in DLD1 and HCT15 cells. Bars, SD; \*,  $P < 0.05$ ; \*\*,  $P < 0.01$ ; \*\*\*,  $P < 0.001$ .

**Supplementary Figure 3.** (A-B) Western blotting showing the expression of c-Myc and cyclin D1 in the RanBP3-knockout cells (A) and RanBP3-overexpressing cells (B).

**Supplementary Figure 4.** (A) Analysis of cell apoptosis upon NU2058 treatment by flow cytometry. (B) Western blotting showing the expression of apoptosis markers in NU2058-treated CRC cells. Bars, SD; \*,  $P < 0.05$ ; \*\*,  $P < 0.01$ ; \*\*\*,  $P < 0.001$ .

**A**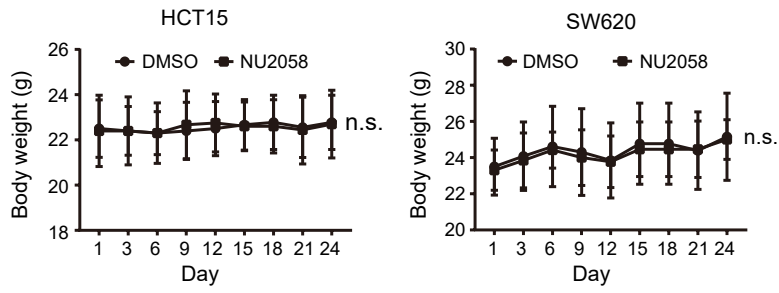**B**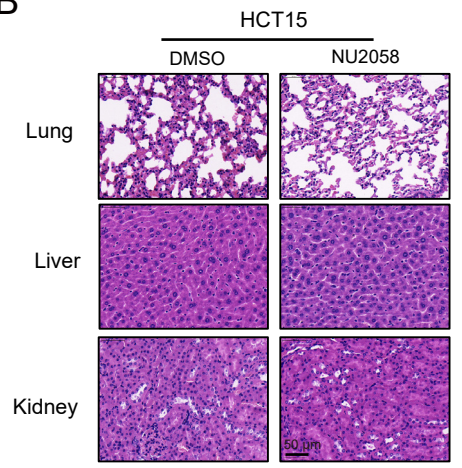**C**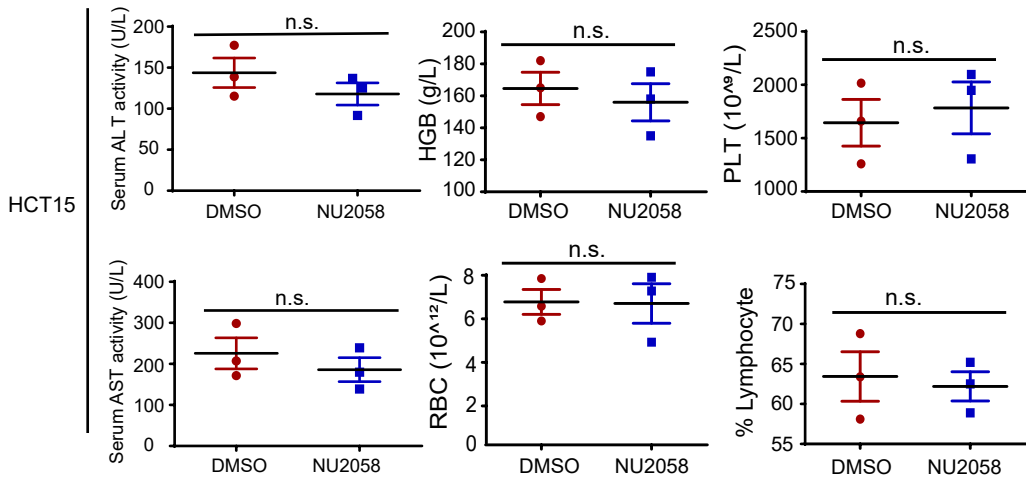**D**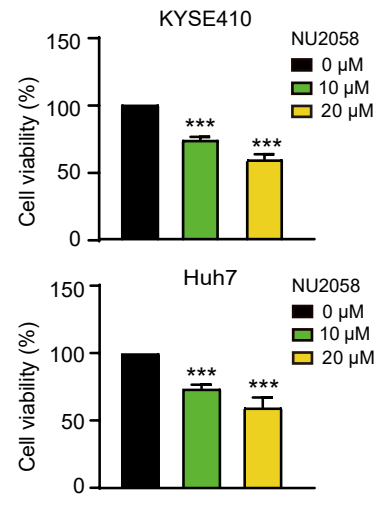

Supplementary Figure 1

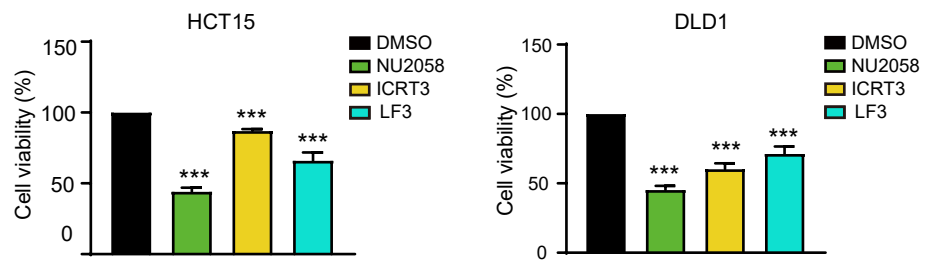

**A**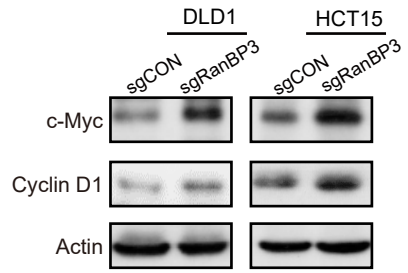**B**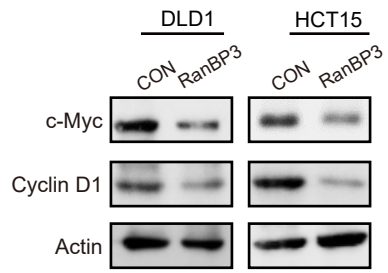

**A**

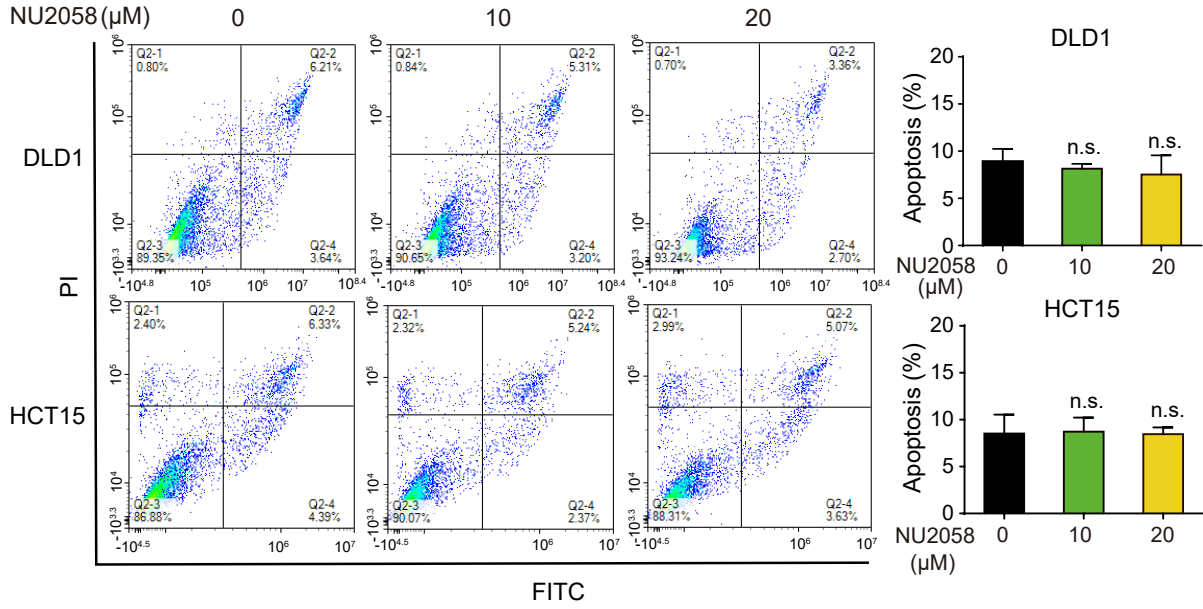

**B**

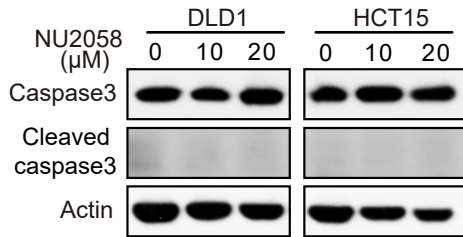

**Supplementary Table 1.** The effect of 280 drugs on CRC cell proliferation.

|    | <b>Compound</b>                        | <b>Cell viability of DLD1 (%)</b> | <b>Cell viability of RKO (%)</b> | <b>Cell viability of NCM460 (%)</b> |
|----|----------------------------------------|-----------------------------------|----------------------------------|-------------------------------------|
| 1  | Defactinib (VS-6063, PF-04554878)      | 100.5                             | 67.9                             | 103.8                               |
| 2  | CL-387785 (EKI-785)                    | 31.9                              | 36.0                             | 87.8                                |
| 3  | 1NM-PP1                                | 89.6                              | 94.2                             | 115.0                               |
| 4  | 2-Chloropyrazine                       | 97.8                              | 100.9                            | 123.8                               |
| 5  | NSC 42834                              | 92.0                              | 91.4                             | 120.5                               |
| 6  | Methyl hesperidin                      | 96.1                              | 97.3                             | 118.4                               |
| 7  | Lithium citrate tribasic tetrahydrate  | 100.2                             | 101.1                            | 102.2                               |
| 8  | 2,3-Butanedione 2-Monoxime             | 96.6                              | 98.0                             | 102.5                               |
| 9  | 2-Methoxy-1,4-naphthoquinone           | 20.4                              | 26.6                             | 37.1                                |
| 10 | Ruxolitinib (INCB-18424) phosphate     | 101.8                             | 100.7                            | 96.7                                |
| 11 | Oxfendazole                            | 97.8                              | 45.4                             | 94.6                                |
| 12 | Cyanoacetohydrazide                    | 100.7                             | 105.6                            | 130.0                               |
| 13 | Adenosine 5'-monophosphate monohydrate | 103.5                             | 106.2                            | 130.2                               |
| 14 | Phenformin hydrochloride               | 103.6                             | 106.7                            | 123.5                               |
| 15 | Nilotinib (AMN-107)                    | 102.8                             | 61.3                             | 119.9                               |
| 16 | Y-27632 dihydrochloride                | 102.6                             | 106.7                            | 127.0                               |
| 17 | PIK75                                  | 10.0                              | 26.1                             | 19.7                                |
| 18 | Tofacitinib (CP-690550) Citrate        | 101.3                             | 103.7                            | 103.3                               |
| 19 | TG100-115                              | 100.0                             | 104.6                            | 105.4                               |
| 20 | Amlexanox                              | 101.8                             | 102.1                            | 113.1                               |
| 21 | HTH-01-015                             | 100.3                             | 68.8                             | 116.4                               |
| 22 | SKF-86002                              | 103.7                             | 108.9                            | 123.7                               |
| 23 | RGB-286638 free base                   | 21.5                              | 38.1                             | 37.9                                |
| 24 | LY2409881 trihydrochloride             | 88.5                              | 42.9                             | 113.6                               |
| 25 | PQ401                                  | 105.1                             | 108.1                            | 121.5                               |
| 26 | XL147 analogue                         | 79.6                              | 86.3                             | 104.3                               |
| 27 | CEP-32496                              | 55.3                              | 28.3                             | 88.0                                |
| 28 | INK 128 (MLN0128)                      | 32.6                              | 27.9                             | 48.5                                |
| 29 | AZD2932                                | 89.5                              | 110.6                            | 103.7                               |
| 30 | BX795                                  | 79.4                              | 63.6                             | 85.0                                |
| 31 | BX912                                  | 57.4                              | 36.6                             | 105.6                               |
| 32 | SB202190 (FHPI)                        | 104.2                             | 101.6                            | 123.3                               |
| 33 | Temsirolimus (CCI-779, NSC 683864)     | 86.5                              | 66.7                             | 119.3                               |
| 34 | PF 431396                              | 38.3                              | 34.9                             | 34.0                                |
| 35 | PIK-294                                | 102.8                             | 102.4                            | 121.5                               |

|    |                                           |       |       |       |
|----|-------------------------------------------|-------|-------|-------|
| 36 | SGX-523                                   | 104.3 | 95.6  | 124.4 |
| 37 | HS-173                                    | 29.7  | 42.1  | 33.6  |
| 38 | SBI-0206965                               | 49.1  | 41.0  | 82.7  |
| 39 | CNX-774                                   | 74.8  | 92.8  | 70.4  |
| 40 | BS-181                                    | 99.4  | 92.4  | 99.8  |
| 41 | K 02288                                   | 88.2  | 53.9  | 126.9 |
| 42 | PLX647                                    | 76.1  | 51.2  | 85.9  |
| 43 | VX-702                                    | 104.4 | 79.9  | 99.0  |
| 44 | IRAK-1/4 Inhibitor                        | 104.1 | 99.4  | 123.8 |
| 45 | SBE 13 hydrochloride                      | 104.3 | 102.5 | 122.5 |
| 46 | IM-12                                     | 71.1  | 59.6  | 121.4 |
| 47 | GSK2578215A                               | 97.9  | 97.7  | 85.9  |
| 48 | Losmapimod (GW856553X)                    | 99.5  | 89.7  | 104.5 |
| 49 | LRRK2-IN-1                                | 94.2  | 45.0  | 94.5  |
| 50 | TCS PIM-1 1                               | 100.7 | 100.5 | 100.3 |
| 51 | CX-4945 (Siltitasertib)                   | 56.8  | 71.9  | 125.5 |
| 52 | BLU9931                                   | 83.1  | 66.0  | 91.8  |
| 53 | ANA-12                                    | 93.3  | 98.4  | 123.0 |
| 54 | Decernotinib (VX-509)                     | 103.8 | 108.0 | 124.7 |
| 55 | Dacomitinib (PF299804, PF299)             | 27.1  | 43.1  | 55.6  |
| 56 | TAS-301                                   | 99.9  | 94.6  | 127.0 |
| 57 | Palomid 529 (P529)                        | 91.7  | 58.6  | 84.1  |
| 58 | Pyridone 6                                | 78.0  | 92.6  | 99.5  |
| 59 | Fasudil (HA-1077) hydrochloride           | 100.0 | 106.2 | 105.8 |
| 60 | SMI-4a                                    | 102.0 | 104.2 | 101.4 |
| 61 | AS601245                                  | 88.0  | 74.9  | 112.2 |
| 62 | CGK 733                                   | 38.6  | 31.1  | 26.8  |
| 63 | TBB (NSC 231634)                          | 98.7  | 101.9 | 123.7 |
| 64 | ZCL 278                                   | 99.8  | 98.6  | 122.5 |
| 65 | Daphnetin                                 | 98.6  | 90.6  | 125.1 |
| 66 | 7,8-Dihydroxyflavone                      | 97.2  | 98.3  | 127.2 |
| 67 | Ginsenoside Rg2                           | 98.0  | 97.9  | 110.0 |
| 68 | Lapatinib (GW-572016) Ditosylate          | 71.9  | 59.5  | 104.8 |
| 69 | Palbociclib (PD-0332991)<br>hydrochloride | 81.2  | 60.0  | 97.1  |
| 70 | Palbociclib (PD0332991)<br>Isethionate    | 81.1  | 57.6  | 96.5  |
| 71 | TSU-68 (SU6668, Orantinib)                | 93.7  | 92.6  | 125.4 |
| 72 | LY2835219 mesylate                        | 45.8  | 45.5  | 32.7  |
| 73 | Forsythin                                 | 91.4  | 98.5  | 115.4 |
| 74 | Balicatib                                 | 94.2  | 95.1  | 112.6 |
| 75 | BIX02188                                  | 91.9  | 85.3  | 118.6 |
| 76 | CX-6258                                   | 63.3  | 6.4   | 5.0   |



|     |                                             |       |       |       |
|-----|---------------------------------------------|-------|-------|-------|
| 77  | (R)-Ruxolitinib (INCB018424)                | 96.5  | 97.0  | 99.0  |
| 78  | ZM 336372                                   | 95.0  | 81.5  | 103.5 |
| 79  | Afatinib (BIBW2992) Dimaleate               | 12.1  | 29.9  | 23.8  |
| 80  | 6-BIO                                       | 6.5   | 1.1   | 18.9  |
| 81  | XL184 (Cabozantinib malate)                 | 14.6  | 22.6  | 74.7  |
| 82  | Apitolisib (GDC-0980, RG7422)               | 31.0  | 22.9  | 46.4  |
| 83  | Afuresertib                                 | 50.6  | 34.5  | 28.1  |
| 84  | Acalisib (GS-9820)                          | 87.8  | 63.1  | 97.3  |
| 85  | NVP-BVU972                                  | 91.7  | 71.0  | 94.0  |
| 86  | BMS-265246                                  | 79.7  | 62.2  | 93.9  |
| 87  | PF-04217903                                 | 96.7  | 87.6  | 98.5  |
| 88  | ML167                                       | 89.7  | 82.0  | 95.1  |
| 89  | JNK-IN-8                                    | 77.7  | 42.8  | 91.3  |
| 90  | WH-4-023                                    | 80.9  | 83.5  | 99.2  |
| 91  | WHI-P258                                    | 87.8  | 98.1  | 98.5  |
| 92  | TH588                                       | 57.7  | 42.6  | 52.9  |
| 93  | GNF-5                                       | 102.9 | 105.0 | 97.9  |
| 94  | ISRIB                                       | 109.9 | 95.5  | 101.3 |
| 95  | WHI-P180                                    | 87.3  | 66.3  | 100.0 |
| 96  | Oclacitinib                                 | 105.5 | 96.2  | 98.5  |
| 97  | RKI-1313                                    | 111.2 | 91.3  | 93.7  |
| 98  | GDC-0032                                    | 72.6  | 37.6  | 89.6  |
| 99  | ZM 323881 hydrochloride                     | 98.5  | 89.4  | 100.6 |
| 100 | LY2090314                                   | 107.3 | 79.9  | 67.6  |
| 101 | PD153035 hydrochloride                      | 4.9   | 25.4  | 76.0  |
| 102 | ZM 306416                                   | 100.7 | 106.6 | 103.0 |
| 103 | KU-60019                                    | 106.5 | 57.6  | 108.0 |
| 104 | PHT-427                                     | 109.2 | 108.5 | 102.8 |
| 105 | R406 free base                              | 99.7  | 86.4  | 99.3  |
| 106 | SKLB1002                                    | 108.7 | 105.5 | 102.4 |
| 107 | ID-8                                        | 105.5 | 110.3 | 100.9 |
| 108 | PF-562271                                   | 32.9  | 42.9  | 37.1  |
| 109 | Torkinib (PP242)                            | 48.3  | 31.2  | 64.9  |
| 110 | EHop-016                                    | 23.1  | 43.2  | 36.2  |
| 111 | Binimetinib (MEK162, ARRY-162, ARRY-438162) | 88.1  | 28.5  | 98.6  |
| 112 | ZM 39923 hydrochloride                      | 109.3 | 102.7 | 102.2 |
| 113 | D 4476                                      | 105.8 | 109.6 | 103.1 |
| 114 | PIK-90                                      | 87.3  | 63.0  | 99.9  |
| 115 | KI8751                                      | 68.5  | 69.9  | 93.0  |
| 116 | GZD824 Dimesylate                           | 0.9   | 24.6  | 28.0  |
| 117 | AZD5438                                     | 34.3  | 35.9  | 23.2  |
| 118 | MK8745                                      | 70.0  | 72.5  | 83.6  |

|     |                                               |       |       |       |
|-----|-----------------------------------------------|-------|-------|-------|
| 119 | PP121                                         | 28.3  | 26.7  | 24.8  |
| 120 | SL-327                                        | 103.4 | 53.1  | 100.7 |
| 121 | MLN0905                                       | 76.7  | 47.3  | 38.5  |
| 122 | SB590885                                      | 110.4 | 55.8  | 103.8 |
| 123 | CID755673                                     | 106.8 | 98.0  | 102.1 |
| 124 | PF-06447475                                   | 105.7 | 115.2 | 103.9 |
| 125 | WS3                                           | 22.8  | 42.8  | 24.2  |
| 126 | WS6                                           | 35.8  | 47.5  | 26.7  |
| 127 | CGI1746                                       | 86.9  | 108.6 | 94.8  |
| 128 | CC-292 (AVL-292)                              | 32.9  | 48.4  | 72.2  |
| 129 | CEP-33779                                     | 98.8  | 52.1  | 96.2  |
| 130 | BIX02189                                      | 82.4  | 58.4  | 92.8  |
| 131 | Baricitinib (LY3009104,<br>INCB028050)        | 103.5 | 110.9 | 99.5  |
| 132 | AZ5104                                        | 23.4  | 52.0  | 31.1  |
| 133 | PRT062607 (P505-15, BIIB057)<br>hydrochloride | 64.8  | 33.1  | 72.9  |
| 134 | AT13148                                       | 103.0 | 72.8  | 94.3  |
| 135 | Tideglusib                                    | 103.3 | 92.4  | 99.8  |
| 136 | PD-173955                                     | 76.4  | 43.4  | 88.8  |
| 137 | GSK2334470                                    | 67.5  | 37.6  | 93.6  |
| 138 | GSK2126458(Omipalisib)                        | 10.5  | 44.6  | 37.1  |
| 139 | Thiazovivin                                   | 103.5 | 92.1  | 95.7  |
| 140 | R788 (Fostamatinib) Disodium                  | 88.1  | 71.5  | 93.6  |
| 141 | KN-93 Phosphate                               | 98.7  | 120.1 | 97.1  |
| 142 | CHIR-98014                                    | 109.1 | 117.0 | 95.7  |
| 143 | CCT137690                                     | 17.3  | 41.0  | 36.4  |
| 144 | GSK2606414                                    | 53.3  | 62.4  | 85.9  |
| 145 | SNS-314 Mesylate                              | 46.5  | 38.9  | 86.0  |
| 146 | CH5132799                                     | 59.2  | 24.3  | 80.8  |
| 147 | SGI-1776 free base                            | 8.3   | 42.8  | 32.2  |
| 148 | GLPG0634 analogue                             | 86.3  | 76.4  | 93.9  |
| 149 | Gandotinib (LY2784544)                        | 42.5  | 45.6  | 71.4  |
| 150 | UNC2881                                       | 84.7  | 75.4  | 86.2  |
| 151 | G-749                                         | 0.5   | 29.9  | 22.0  |
| 152 | PF670462                                      | 90.9  | 74.2  | 93.0  |
| 153 | Poziotinib (HM781-36B)                        | 66.8  | 60.3  | 45.4  |
| 154 | CHIR98014                                     | 88.0  | 44.8  | 54.5  |
| 155 | KRCA-0008                                     | 63.5  | 53.1  | 58.1  |
| 156 | GZD 824                                       | 1.8   | 12.8  | 23.8  |
| 157 | GSK429286A                                    | 101.8 | 97.2  | 95.1  |
| 158 | GSK2656157                                    | 84.3  | 85.8  | 89.9  |
| 159 | RO 3280                                       | 71.2  | 40.1  | 47.0  |

|     |                                        |       |       |       |
|-----|----------------------------------------|-------|-------|-------|
| 160 | OSI 930                                | 101.1 | 89.0  | 94.2  |
| 161 | GW 2580                                | 88.4  | 98.0  | 93.4  |
| 162 | Flavopiridol (Alvocidib) hydrochloride | 22.2  | 31.3  | 19.3  |
| 163 | PIK-93                                 | 60.0  | 27.9  | 79.6  |
| 164 | IC-87114                               | 93.6  | 94.2  | 95.8  |
| 165 | AG18                                   | 91.6  | 85.0  | 99.9  |
| 166 | APY0201                                | 16.5  | 29.6  | 33.7  |
| 167 | kb NB 142-70                           | 96.5  | 92.0  | 100.7 |
| 168 | AZD7545                                | 90.7  | 67.8  | 87.9  |
| 169 | ML347                                  | 44.4  | 48.2  | 48.3  |
| 170 | LDN-214117                             | 90.5  | 56.9  | 102.3 |
| 171 | CZC24832                               | 93.0  | 95.6  | 95.3  |
| 172 | MK-2206 dihydrochloride                | 88.9  | 48.2  | 87.8  |
| 173 | L-779,450                              | 98.0  | 43.4  | 93.4  |
| 174 | SRPIN340                               | 99.1  | 88.0  | 91.7  |
| 175 | AZD2858                                | 105.0 | 92.7  | 89.9  |
| 176 | AZ20                                   | 36.9  | 38.5  | 31.0  |
| 177 | PND-1186                               | 71.9  | 27.7  | 81.9  |
| 178 | ASP 3026                               | 76.5  | 49.9  | 86.5  |
| 179 | INCB28060 (Capmatinib)                 | 100.6 | 89.5  | 100.5 |
| 180 | AZD3463                                | 27.8  | 19.9  | 28.2  |
| 181 | BYL-719 (Alpelisib)                    | 63.7  | 28.5  | 81.9  |
| 182 | Filgotinib (GLPG0634)                  | 100.2 | 96.5  | 87.1  |
| 183 | LDN212854                              | 1.9   | 36.5  | 23.3  |
| 184 | MHY1485                                | 98.9  | 98.8  | 90.6  |
| 185 | NVP 231                                | 30.0  | 36.6  | 49.9  |
| 186 | PH797804                               | 103.6 | 97.2  | 99.6  |
| 187 | TAE226 (NVP-TAE226)                    | 22.3  | 25.3  | 69.9  |
| 188 | RN486                                  | 103.2 | 89.6  | 100.8 |
| 189 | BML-275                                | 101.3 | 96.0  | 102.2 |
| 190 | AT 7519 hydrochloride salt             | 37.7  | 33.9  | 27.2  |
| 191 | SKLB 610                               | 87.5  | 102.3 | 72.9  |
| 192 | RKI-1447                               | 105.1 | 71.5  | 85.6  |
| 193 | TG003                                  | 100.2 | 90.2  | 81.4  |
| 194 | U0126-EtOH                             | 99.0  | 72.5  | 92.5  |
| 195 | AMG-337                                | 95.8  | 88.9  | 97.4  |
| 196 | URMC-099                               | 10.7  | 46.4  | 35.3  |
| 197 | CH5183284 (Debio-1347)                 | 71.3  | 47.5  | 75.4  |
| 198 | FRAX597                                | 19.5  | 68.1  | 87.4  |
| 199 | Ro 31-8220 Mesylate                    | 32.4  | 37.3  | 26.1  |
| 200 | CVT-313                                | 71.5  | 79.9  | 94.4  |
| 201 | YM201636                               | 53.9  | 42.0  | 28.0  |

|     |                             |       |       |       |
|-----|-----------------------------|-------|-------|-------|
| 202 | GW 441756                   | 98.8  | 76.4  | 65.9  |
| 203 | R112                        | 40.3  | 35.4  | 86.3  |
| 204 | GNF-7                       | 41.9  | 28.1  | 76.0  |
| 205 | VX-11e                      | 75.8  | 28.1  | 90.8  |
| 206 | SZL P1-41                   | 103.7 | 94.2  | 101.5 |
| 207 | Carbazochrome               | 102.6 | 99.8  | 101.3 |
| 208 | Gypenoside XVII             | 104.7 | 96.1  | 101.0 |
| 209 | Momordin Ic                 | 103.2 | 97.7  | 102.0 |
| 210 | NU7441 (KU-57788)           | 91.6  | 50.8  | 99.7  |
| 211 | MRT67307                    | 80.7  | 49.5  | 78.0  |
| 212 | Solcitinib                  | 97.8  | 94.4  | 91.0  |
| 213 | Ensartinib                  | 65.3  | 35.7  | 72.1  |
| 214 | GNE-0877                    | 96.8  | 85.0  | 94.0  |
| 215 | Ddr1-In-1                   | 87.5  | 43.5  | 49.2  |
| 216 | Sodium houttuyfonate        | 101.3 | 87.6  | 96.7  |
| 217 | Mubritinib (TAK 165)        | 98.7  | 100.0 | 89.9  |
| 218 | Kaempferitrin               | 102.4 | 88.8  | 99.5  |
| 219 | AZ 960                      | 70.5  | 48.7  | 71.9  |
| 220 | CZC-25146                   | 70.6  | 63.5  | 85.1  |
| 221 | JNK-IN-7                    | 26.6  | 45.4  | 30.4  |
| 222 | NQDI-1                      | 98.7  | 93.2  | 87.4  |
| 223 | IQ-1S                       | 94.2  | 79.7  | 79.3  |
| 224 | ETC-1002                    | 94.3  | 85.6  | 91.5  |
| 225 | BAW2881                     | 91.8  | 66.7  | 86.7  |
| 226 | SC66                        | 23.6  | 39.0  | 30.8  |
| 227 | MLN1117                     | 79.5  | 50.3  | 92.4  |
| 228 | AZD-9291 mesylate           | 25.1  | 33.9  | 29.8  |
| 229 | AZD3759                     | 83.0  | 81.4  | 98.0  |
| 230 | K858                        | 31.9  | 42.4  | 49.8  |
| 231 | Dimethylenastron            | 24.5  | 37.1  | 31.9  |
| 232 | Mollugin                    | 56.5  | 44.2  | 86.6  |
| 233 | Hydroxysafflor yellow A     | 85.6  | 87.3  | 93.0  |
| 234 | Ruboxistaurin hydrochloride | 69.0  | 51.1  | 33.3  |
| 235 | GNE 477                     | 24.5  | 15.4  | 47.5  |
| 236 | AM-2394                     | 75.7  | 86.2  | 95.4  |
| 237 | HUHS015                     | 37.8  | 45.7  | 55.6  |
| 238 | NU2058                      | 58.2  | 86.4  | 90.7  |
| 239 | CC-223                      | 41.3  | 28.7  | 65.6  |
| 240 | XMD8-87                     | 58.0  | 89.2  | 101.7 |
| 241 | XMD16-5                     | 21.2  | 45.4  | 93.5  |
| 242 | Selonsertib                 | 87.4  | 81.0  | 97.1  |
| 243 | SCH900776 S-isomer          | 73.6  | 43.5  | 71.6  |
| 244 | MCC950                      | 90.9  | 85.7  | 100.2 |

|     |                                     |       |       |       |
|-----|-------------------------------------|-------|-------|-------|
| 245 | GDC-0084                            | 58.7  | 41.1  | 90.1  |
| 246 | GNE-3511                            | 81.6  | 71.7  | 94.1  |
| 247 | SUN 11602                           | 92.9  | 86.1  | 102.0 |
| 248 | BI-78D3                             | 64.3  | 63.5  | 101.7 |
| 249 | magnolol                            | 86.8  | 96.8  | 102.6 |
| 250 | Olivetol                            | 93.9  | 88.9  | 101.0 |
| 251 | ML281                               | 101.7 | 63.3  | 101.8 |
| 252 | Rolapitant hydrochloride            | 92.8  | 86.8  | 103.3 |
| 253 | KD025 (SLx-2119)                    | 59.8  | 45.2  | 44.5  |
| 254 | Uprosertib (GSK2141795)             | 71.9  | 40.3  | 78.1  |
| 255 | NVP-BSK805 2HCl                     | 62.2  | 17.1  | 27.7  |
| 256 | MCB-613                             | 19.9  | 38.3  | 34.8  |
| 257 | BI-847325                           | 10.0  | 41.3  | 38.2  |
| 258 | WZ4003                              | 92.1  | 98.0  | 101.2 |
| 259 | CC-115                              | 27.3  | 26.2  | 34.1  |
| 260 | ARQ-092                             | 100.6 | 91.3  | 105.6 |
| 261 | GSK583                              | 88.4  | 75.7  | 106.7 |
| 262 | Olmutinib (HM61713, BI 1482694)     | 76.9  | 90.4  | 98.3  |
| 263 | PIK-III                             | 81.8  | 70.6  | 100.4 |
| 264 | PF-543                              | 85.7  | 110.4 | 108.6 |
| 265 | AZD8186                             | 78.7  | 58.9  | 99.7  |
| 266 | FIIN-2                              | 79.5  | 89.0  | 97.0  |
| 267 | DEL-22379                           | 38.0  | 35.8  | 49.6  |
| 268 | CCG215022                           | 97.0  | 99.1  | 105.4 |
| 269 | Desmethylanethol trithione          | 100.3 | 98.4  | 103.2 |
| 270 | eFT508                              | 96.0  | 104.7 | 103.2 |
| 271 | SB239063                            | 96.0  | 92.9  | 107.3 |
| 272 | APS-2-79                            | 82.5  | 103.5 | 101.5 |
| 273 | CHIR-124                            | 11.7  | 39.6  | 31.0  |
| 274 | Pamapimod (R-1503, Ro4402257)       | 90.5  | 86.6  | 100.4 |
| 275 | GSK180736A                          | 99.2  | 106.2 | 106.4 |
| 276 | Ulixertinib (BVD-523,<br>VRT752271) | 59.3  | 25.3  | 102.9 |
| 277 | JI-101                              | 89.6  | 94.5  | 93.5  |
| 278 | GDC-0879                            | 95.2  | 38.6  | 100.8 |
| 279 | BMS-582949 HCl                      | 95.1  | 91.5  | 97.4  |
| 280 | NIH-12848                           | 95.9  | 101.8 | 100.0 |

**Supplementary Table 2.** The binding proteins of NU2058 was identified by Limited proteolysis-small molecule mapping (Lip-SMap).

|    | <b>Entry</b> | <b>Protein Descriptions</b>                                           | <b>Protein Names</b> |
|----|--------------|-----------------------------------------------------------------------|----------------------|
| 1  | Q8TBF2       | Prostamide/prostaglandin F synthase                                   | PXL2B                |
| 2  | P56937       | 3-keto-steroid reductase                                              | DHB7                 |
| 3  | A0FGR8       | Extended synaptotagmin-2                                              | ESYT2                |
| 4  | Q9UI10       | Translation initiation factor eIF-2B subunit delta                    | EI2BD                |
| 5  | P62854       | 40S ribosomal protein S26                                             | RS26                 |
| 6  | P19447       | General transcription and DNA repair factor IIIH helicase subunit XPB | ERCC3                |
| 7  | Q8IW19       | Aprataxin and PNK-like factor                                         | APLF                 |
| 8  | Q96DG6       | Carboxymethylenebutenolidase homolog                                  | CMBL                 |
| 9  | B2RTY4       | Unconventional myosin-Ixa                                             | MYO9A                |
| 10 | Q969U7       | Proteasome assembly chaperone 2                                       | PSMG2                |
| 11 | P46779       | 60S ribosomal protein L28                                             | RL28                 |
| 12 | Q9H6Z4       | Ran-binding protein 3                                                 | RANB3                |
| 13 | Q7L014       | Probable ATP-dependent RNA helicase DDX46                             | DDX46                |
| 14 | Q96EU7       | C1GALT1-specific chaperone 1                                          | C1GLC                |
| 15 | O15511       | Actin-related protein 2/3 complex subunit 5                           | ARPC5                |
| 16 | Q13163       | Dual specificity mitogen-activated protein kinase kinase 5            | MP2K5                |
| 17 | Q9Y478       | 5'-AMP-activated protein kinase subunit beta-1                        | AAKB1                |
| 18 | Q14680       | Maternal embryonic leucine zipper kinase                              | MELK                 |
| 19 | Q9Y5X2       | Sorting nexin-8                                                       | SNX8                 |
| 20 | O75122       | CLIP-associating protein 2                                            | CLAP2                |
| 21 | Q8NBA8       | DTW domain-containing protein 2                                       | DTWD2                |
| 22 | Q15233       | Non-POU domain-containing octamer-binding protein                     | NONO                 |
| 23 | Q53G59       | Kelch-like protein 12                                                 | KLH12                |
| 24 | P63220       | 40S ribosomal protein S21                                             | RS21                 |
| 25 | Q9Y6I9       | Testis-expressed protein 264                                          | TX264                |
| 26 | P52655       | Transcription initiation factor IIA subunit 1                         | TF2AA                |
| 27 | A8MXV4       | Nucleoside diphosphate-linked moiety X motif 19                       | NUD19                |
| 28 | Q9Y6X5       | Bis(5'-adenosyl)-triphosphatase ENPP4                                 | ENPP4                |
| 29 | P08779       | Keratin, type I cytoskeletal 16                                       | K1C16                |
| 30 | Q53EP0       | Fibronectin type III domain-containing protein 3B                     | FND3B                |
| 31 | O00212       | Rho-related GTP-binding protein RhoD                                  | RHOD                 |
| 32 | Q96P47       | Arf-GAP with GTPase, ANK repeat and PH domain-containing protein      | AGAP3                |
| 33 | Q9UBL3       | Set1/Ash2 histone methyltransferase complex subunit ASH2              | ASH2L                |
| 34 | Q8WUJ0       | Serine/threonine/tyrosine-interacting protein                         | STYX                 |
| 35 | P27338       | Amine oxidase [flavin-containing] B                                   | AOFB                 |
| 36 | Q53GL7       | Poly [ADP-ribose] polymerase 10                                       | PAR10                |
| 37 | Q9NQC3       | Reticulon-4                                                           | RTN4                 |
| 38 | Q6UX07       | Dehydrogenase/reductase SDR family member 13                          | DHR13                |
| 39 | P00338       | L-lactate dehydrogenase A chain                                       | LDHA                 |
| 40 | Q9UKM9       | RNA-binding protein Raly                                              | RALY                 |
| 41 | Q9NVX2       | Notchless protein homolog 1                                           | NLE1                 |
| 42 | O75368       | SH3 domain-binding glutamic acid-rich-like protein                    | SH3L1                |
| 43 | Q9BVL4       | Selenoprotein O                                                       | SELO                 |
| 44 | O95415       | Brain protein I3                                                      | BRI3                 |

**Supplementary Table 3.** The list of primers used for mutation design.

| <b>Primer name</b>                                             | <b>Sequence</b>                      |
|----------------------------------------------------------------|--------------------------------------|
| pcDNA3.1 <sup>+</sup> RanBP3 <sup>R354G</sup> -F               | 5'-AGAGGCCGGGGGCTGCTCGGACTCAATGA-3'  |
| pcDNA3.1 <sup>+</sup> RanBP3 <sup>R354G</sup> -R               | 5'-CGAGCAGCCCCCGGCCTCTCTCCACCCA-3'   |
| pcDNA3.1 <sup>+</sup> RanBP3 <sup>L386G</sup> -F               | 5'-ATCCTCAACACCAAGGGGTGGGCCAGAT-3'   |
| pcDNA3.1 <sup>+</sup> RanBP3 <sup>L386G</sup> -R               | 5'-CCCTTGGTGTGAGGATCAGTCGCAGGCT-3'   |
| pcDNA3.1 <sup>+</sup> RanBP3 <sup>D406G, T407G, E408G</sup> -F | 5'-CACAGCCATGGGCGGCGGGACCAGGGCGT-3'  |
| pcDNA3.1 <sup>+</sup> RanBP3 <sup>D406G, T407G, E408G</sup> -R | 5'-CCGCCGCCATGGCTGTGATGCGAATGCTCT-3' |
| c-Myc-promoter site1 <sub>mut</sub> -F                         | 5'-AGTGTATCAGAATCGATGCATTTTTTTG-3'   |
| c-Myc-promoter site1 <sub>mut</sub> -R                         | 5'-ATACACTAAGAGGAGAGGAGTATTAC-3'     |
| c-Myc-promoter site2 <sub>mut</sub> -F                         | 5'-CCCTGGCTTCTCCAAACCCGGCAG-3'       |
| c-Myc-promoter site2 <sub>mut</sub> -R                         | 5'-GCCAGGGGTGCTAGACGGGAGAATATG-3'    |
| cyclinD1-promoter site1 <sub>mut</sub> -F                      | 5'-ACTCTATCTTTGCTTAACAACAGTAAC-3'    |
| cyclinD1-promoter site1 <sub>mut</sub> -R                      | 5'-GATAGAGTCCCGGCAGAGAATGGGAG-3'     |
| cyclinD1-promoter site2 <sub>mut</sub> -F                      | 5'-TTACCAGTCCTGGAGCCTCCAGAGG-3'      |
| cyclinD1-promoter site2 <sub>mut</sub> -R                      | 5'-CTGGTAAACTTCAACAAAACCTCCCCT-3'    |

**Supplementary Table 4.** The target sequences of siRNA against  $\beta$ -catenin.

| <b>siRNA</b>           | <b>Target sequence</b>       |
|------------------------|------------------------------|
| si- $\beta$ -catenin-F | 5'-GUUAUCAGAGGACUAAAUATT-3'  |
| si- $\beta$ -catenin-R | 5'-UAUUUAGUCCUCUGAUA ACTT-3' |



**Supplementary Table 5.** The primers of GAPDH, c-Myc and cyclin D1.

| <b>Primer name</b> | <b>Sequence</b>                |
|--------------------|--------------------------------|
| GAPDH-F            | 5'-CGGAGTCAACGGATTTGGTCGTAT-3' |
| GAPDH-R            | 5'-AGCCTTCTCCATGGTGGTGAAGAC-3' |
| c-Myc-F            | 5'-CCTGGTGCTCCATGAGGAGAC-3'    |
| c-Myc-R            | 5'-CAGACTCTGACCTTTTGCCAGG-3'   |
| Cyclin D1-F        | 5'-TCTACACCGACAACCTCCATCCG-3'  |
| Cyclin D1-R        | 5'-TCTGGCATTTTGGAGAGGAAGTG-3'  |
